# Supplementary material for: CAXII Is a Surrogate Marker for Luminal Breast Tumors Regulated by ER and GATA3
Source: MDPI journal article supplement (doi:10.3390/cancers14215453), 2022-11-06
Supplement: s1 [file s1]

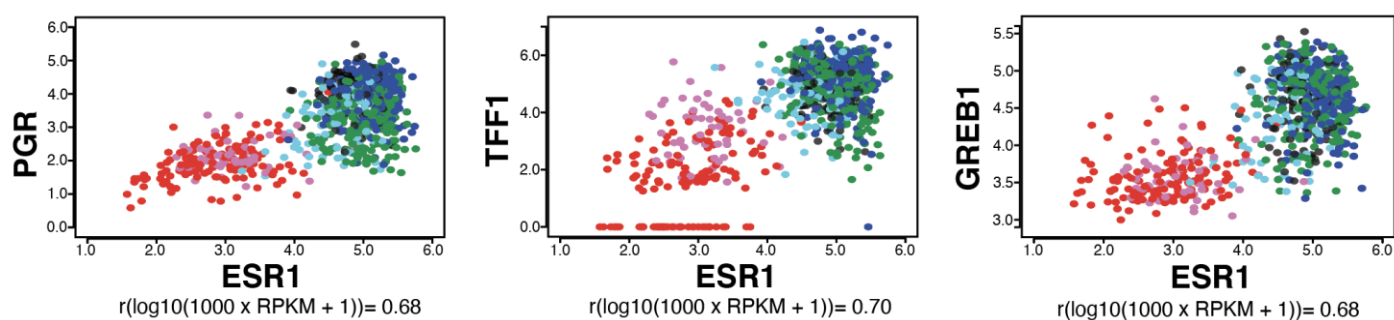

**Figure S1. Correlations between mRNA levels of *ESR1* and of several estrogen target genes in breast cancer.** Tumor subtypes according to the CIT classification are indicated by colors. Luminal A tumors appear in dark blue, luminal B in green, luminal C in light blue, molecular apocrine in magenta and basal-like in red. Normal-like or non-classified tumors are shown in black.

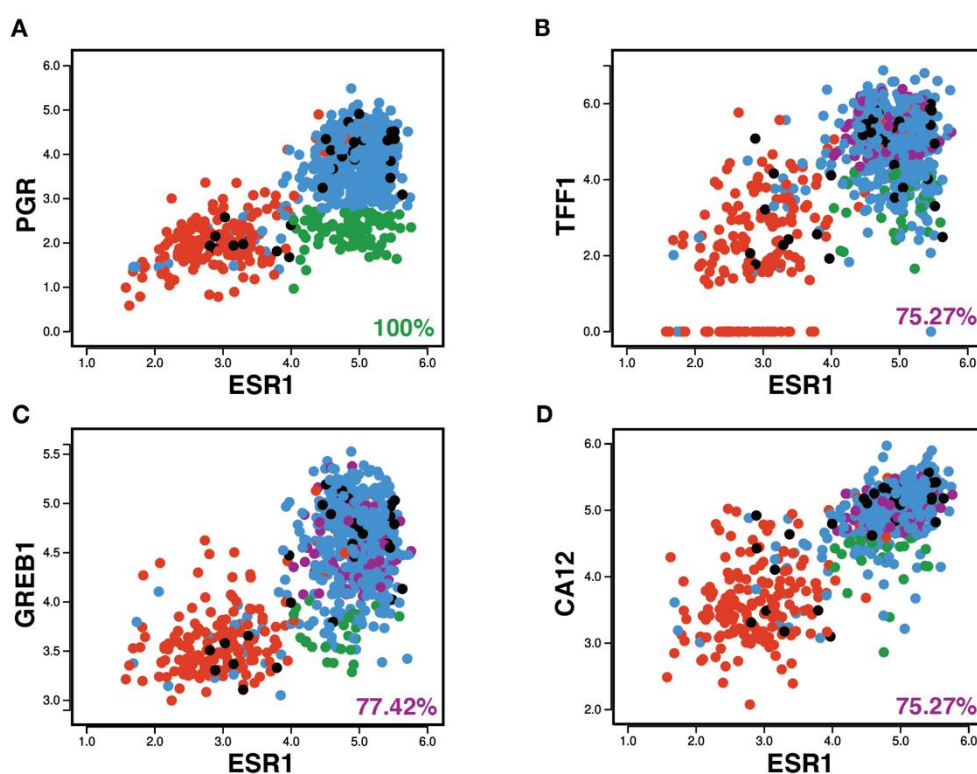

**Figure S2. *ESR1*<sup>high</sup>*PGR*<sup>low</sup> status does not imply lack of ER signaling.** Pair-wise scatterplots for the expression of *PGR* vs *ESR1* generated using MiSTIC [39] (<http://mistic.irc.ca>, accessed on 1 September 2022). Tumors highlighted in green (A) are *ESR1*<sup>high</sup>*PGR*<sup>low</sup> (PGR cut-off excluding 90% of *ESR1*<sup>low</sup> tumors). The percentages of these tumors that are *TFF1*<sup>high</sup> (B) *GREB1*<sup>high</sup> (C) or *CA12*<sup>high</sup> (D) using cut-offs for these genes that exclude 90% of *ESR1*<sup>low</sup> tumors are indicated and the corresponding tumors are highlighted in purple.

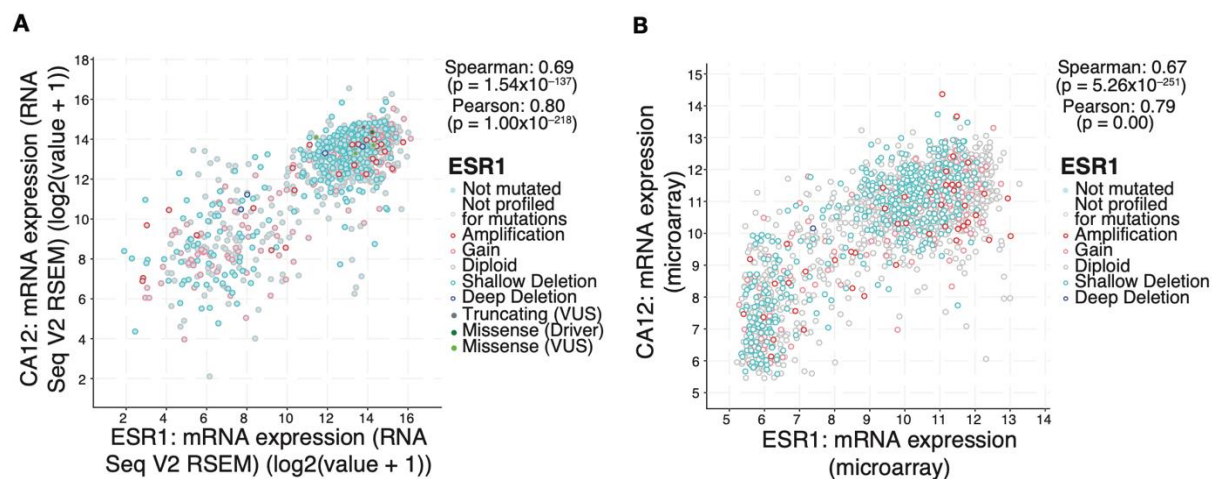

**Figure S3. CA12 is mainly expressed in luminal tumors.** Correlation between *ESR1* and *CA12* mRNA expression levels in (A) the TCGA Firehose Legacy breast invasive carcinoma dataset (960 tumors) and (B) the METABRIC microarray dataset (1904 tumors). Data was generated from [www.cbioportal.org](http://www.cbioportal.org), accessed on 1 September 2022, by querying the *CA12* and *ESR1* genes in the above-mentioned datasets.

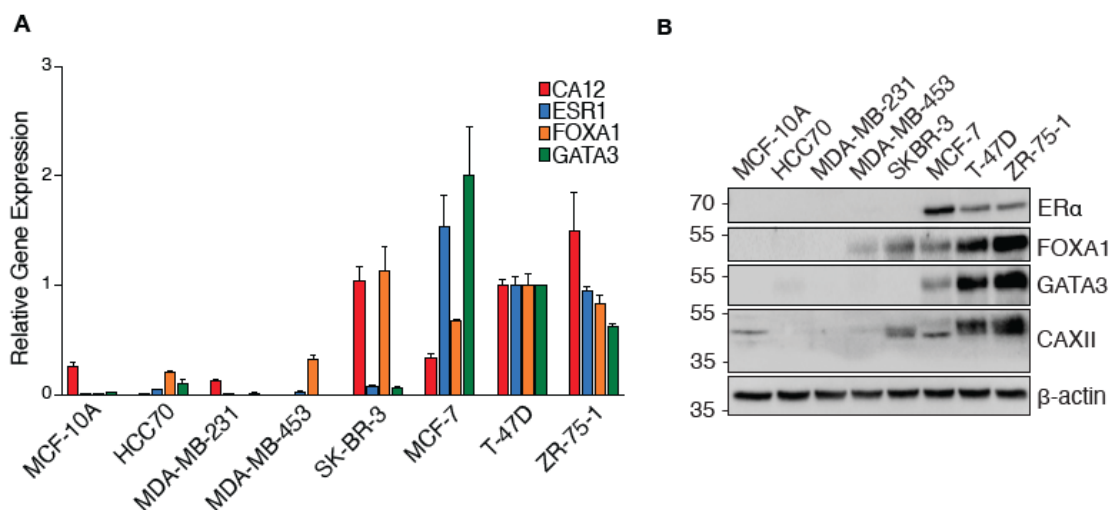

**Figure S4. CA12 is highly expressed in luminal and in some mApo breast cancer cell lines.** MCF-10A, HCC-70, MDA-MB-231, MDA-MB-453, SKBR-3, MCF-7, T-47D and ZR-75-1 cell lines were cultured in hormone-replete medium and collected for mRNA and protein analysis. (A) *CA12*, *ESR1*, *FOXA1* and *GATA3* mRNA levels were measured by RT-qPCR (Representative N, N=3). *RPLP0* and *YWHAZ* were used as housekeeping genes for normalization. Expression levels are shown relative to those in T-47D cells. (B) Protein levels of ERα, FOXA1, GATA3, CAXII and β-actin were analyzed by western blotting using specific antibodies (N=3, a representative blot is shown). β-actin serves as a loading control.

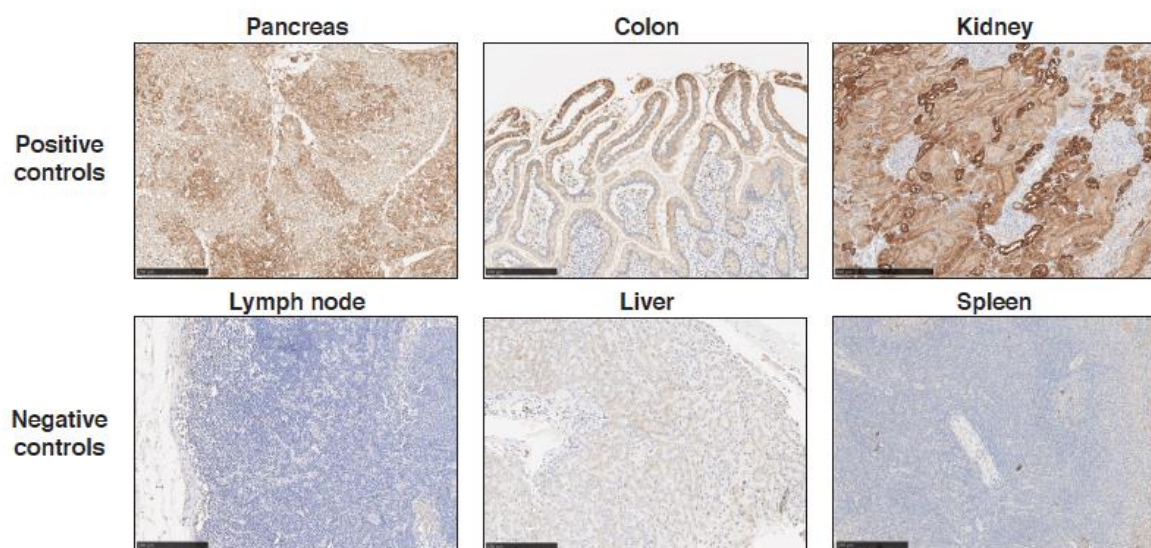

**Figure S5. CAXII staining optimization.** Pancreas, colon and kidney are positive controls for CAXII expression and lymph node, liver and spleen are negative controls.



**A****ERα**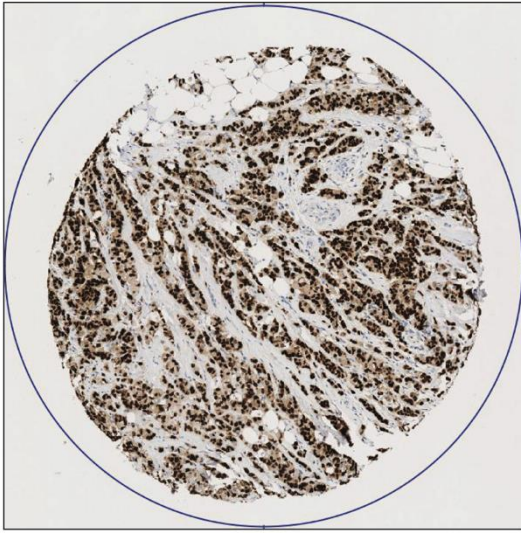**B****CAXII**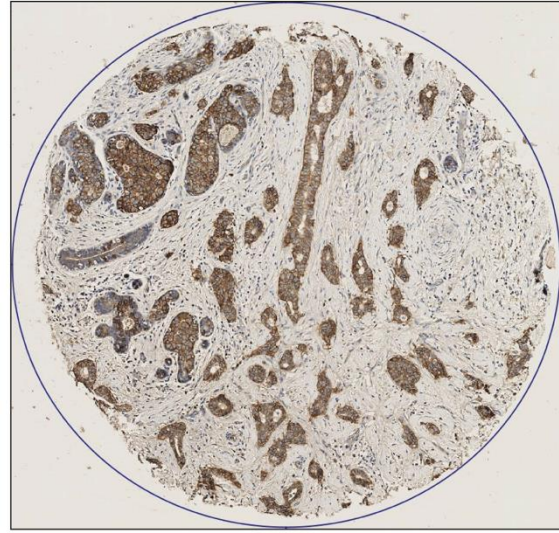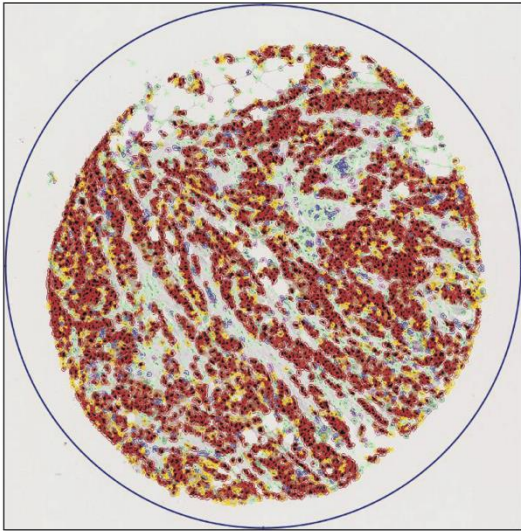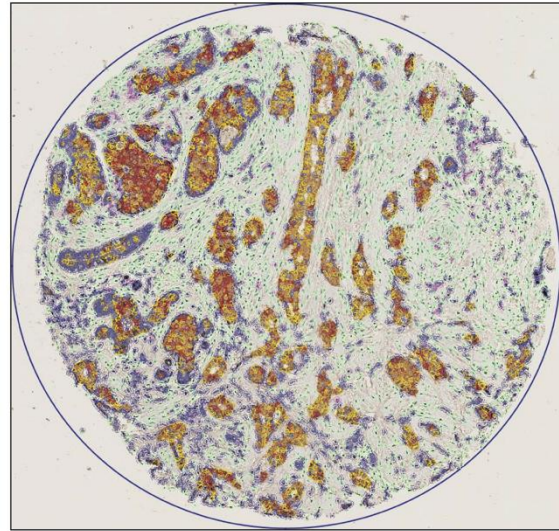

**Figure S6. Tumor cell detection and scoring by QuPath in breast tumor sections.** Cell type attribution and scoring of epithelial tumor cells on breast tumor sections stained for ERα (**A**) or CAXII (**B**) was assessed using QuPath. Purple cells correspond to immune cells, green cells to stromal cells, yellow, orange and red cells to increasing intensity of expression of each marker in epithelial cells.

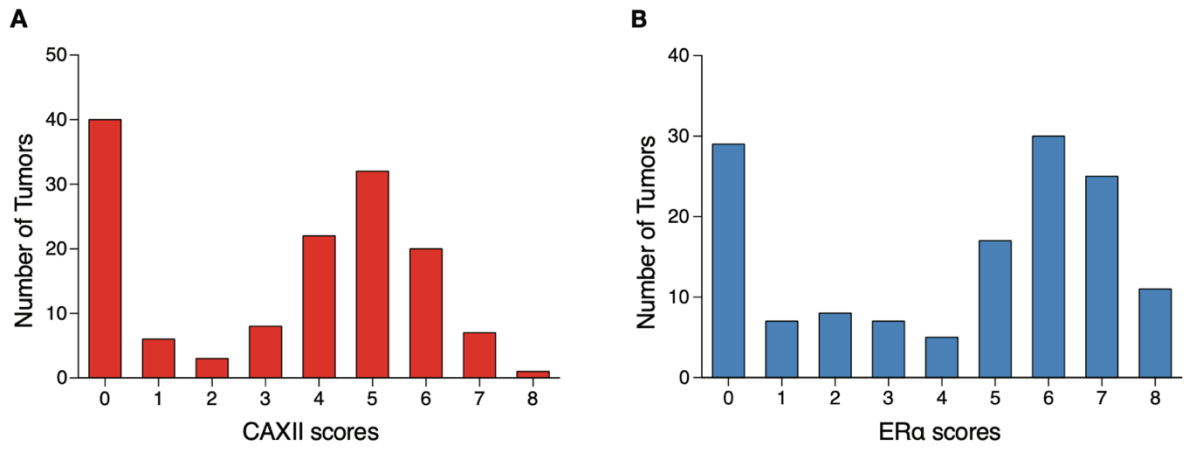

**Figure S7. Bimodal distribution of CAXII and ERa QuPath scores.** Histograms representing the number of tumors for each score. Scores (from 0 to 8) were generated with QuPath by analyzing the percentages of expressing cells and staining intensity for CAXII (A) and ERa (B).

**Table S1.** RT-qPCR primer sequences.

| Gene                     | UPL probe number | Primer sequences                |
|--------------------------|------------------|---------------------------------|
| <i>RPLP0</i> (Reference) | 74               | 5'-TCCCACCTTGCTGAAAAGGTC-3'     |
|                          |                  | 5'-AGCAGGAGCAGCTGTGGT-3'        |
| <i>YWHAZ</i> (Reference) | 2                | 5'-GCAATTACTGAGAGACAACTTGACA-3' |
|                          |                  | 5'-TGGAAGGCCGGTTAATTTT-3'       |
| <i>CA12</i>              | 11               | 5'-GCTCCTGCTGGTGATCTTAAA-3'     |
|                          |                  | 5'-CCAAAATAAGTCCACTTGGAACC-3'   |
| <i>ESR1</i>              | 25               | 5'-AAGAAACCGGATGGCAGTC-3'       |
|                          |                  | 5'-CAGTGTGTGGTGGACTACGG-3'      |
| <i>FOXA1</i>             | 47               | 5'-ATCATTGCCATCGTGTGCTT-3'      |
|                          |                  | 5'-CACCATGTCCAACGTGGAA-3'       |
| <i>GATA3</i>             | 36               | 5'-ACTACGGAACTCGGTCAGG-3'       |
|                          |                  | 5'-GGTAGGGATCCATGAAGCAG-3'      |

**Table S2.** Immunoblotting and immunoprecipitation conditions.

|          | Reference          | Provider                  | Species | Dilution for Western blotting | Quantity for ChIP-qPCR (μg) |
|----------|--------------------|---------------------------|---------|-------------------------------|-----------------------------|
| CAXII    | Ref 47             | Drs Sly and Waheed        | rabbit  | 1/3000                        | 3                           |
| ERα      | 04-820 (clone 60C) | Millipore Sigma           | rabbit  | 1/3000                        | 3                           |
| FOXA1    | HPA050505          | Sigma-Aldrich             | rabbit  | 1/1000                        | 3                           |
| GATA3    | 558686             | BD Pharmingen             | mouse   | 1/3000                        | -                           |
|          | ab199428           | Abcam                     | rabbit  | -                             | 3                           |
| Lamin B1 | ab16048            | Abcam                     | rabbit  | 1/3000                        | -                           |
| b-actin  | A5441              | Sigma-Aldrich             | rabbit  | 1/10000                       | -                           |
| IgG      | 3900S              | Cell Signaling Technology | rabbit  | -                             | 3                           |

**Table S3.** SiRNA oligonucleotide sequences.

| Gene                    | Sequence                                |
|-------------------------|-----------------------------------------|
| Control                 | UGGUUUACAUGUCGACUAA                     |
| <i>CA12</i> (SMARTpool) | GAGGACCGCUGAAUUAUAC CCAUAGACCUGCACAGUGA |
|                         | CCAGAGAAAUGAUCAACAA GCUACAAUCUGUCUGCCAA |
| <i>ESR1</i> #1          | GAAUGUGCCUGGCUAGAGAUU                   |
| <i>ESR1</i> #2          | CAUGAGAGCUGCCAACCUUUU                   |
| <i>FOXA1</i> #1         | GCACUGCAAUACUCGCCUUUU                   |
| <i>FOXA1</i> #2         | CCUAAACACUCCUAGCUCUU                    |
| <i>GATA3</i> #1         | AAGCCUAAACGCGAUGGAUAUUU                 |
| <i>GATA3</i> #2         | AACAUCGACGGUCAAGGCAACUU                 |

**Table S4.** ChIP-qPCR primer sequences.

| Gene            | UPL probe # | Sequence                     |
|-----------------|-------------|------------------------------|
| Desert region 1 | 82          | 5'-CCACCAGTGCATCCTCGAAT-3'   |
|                 |             | 5'-TTTCCCTTAGATGGACGGCG-3'   |
| Desert region 2 | 22          | 5'-GATTCCAGAGTGTTCTGAGGCT-3' |
|                 |             | 5'-GGTTAGTTGCCCCCTCGAAA-3'   |
| CA12 enhancer 1 | 65          | 5'-TCTTCTCCACGCCCTGTAAA-3'   |
|                 |             | 5'-GACAGCTGCCAGGTACGG-3'     |
| CA12 enhancer 2 | 60          | 5'-ACATCATGCCAGCTAGTTGACT-3' |
|                 |             | 5'-TCTCTTGAGAGTCACAGTGC-3'   |
| CA12 enhancer 3 | 38          | 5'-ATATCAGAGGTCCTGGGCCC-3'   |
|                 |             | 5'-TCAGGGAAAGTTCTAGCACCC-3'  |

**Table S5.** Clinicopathological characteristics of the 118 breast tumors.

| Clinicopathological characteristics    | Numbers (%) |
|----------------------------------------|-------------|
| <u>Histological subtypes (118/118)</u> |             |
| Ductal carcinoma (IDC and DCIS)        | 109 (~92.4) |
| Lobular carcinoma                      | 9 (~7.6)    |
| <u>Histological grade (115/118)</u>    |             |
| Grade I                                | 21 (~18.3)  |
| Grade II                               | 45 (~39.1)  |
| Grade III                              | 50 (~43.5)  |
| <u>Tumor types (118/118)</u>           |             |
| ER+                                    | 72 (~61.0)  |
| ER+PR+                                 | 55 (~46.6)  |
| ER+PR-                                 | 17 (~14.4)  |
| HER2+                                  | 9 (~7.6)    |
| ER-PR-                                 | 9 (~7.6)    |
| ER-HER2-                               | 37 (~31.4)  |
| ER-PR+HER2- (ER-PR+)                   | 3 (~2.5)    |
| ER-PR-HER2- (TN)                       | 34 (~28.8)  |

**Table S6.** Antibodies and IHC staining conditions.

| Antibody                                | Provider                    | Dilution | Staining            | Epitope retrieval | Positive control                                      | Negative control                     | Tested concentrations                                           |
|-----------------------------------------|-----------------------------|----------|---------------------|-------------------|-------------------------------------------------------|--------------------------------------|-----------------------------------------------------------------|
| CAXII                                   | Drs Sly and Waheed (ref 47) | 1/750    | poly@Rb<br>15/0/8   | H1(10)            | mammary gland - pancreas - kidney - colon             | lung - spleen - liver - lymph nodes  | 1/500 - 1/750 - 1/1000 (colon)                                  |
| ER $\alpha$<br>(sc-8002)<br>(0.2 mg/ml) | Santa Cruz Biotechnologies  | 1/1000   | poly@Ms<br>30/15/15 | H1(20)            | endometrium - Fallopian tube - uterus - mammary gland | heart - tonsil - colon               | 1/500 - 1/750 - 1/1000 (mammary gland)                          |
| FOXA1<br>(HPA050505)<br>(0.3 mg/ml)     | Sigma-Aldrich               | 1/1000   | poly@Rb<br>30/0/15  | H1(20)            | stomach - prostate - bladder - mammary gland          | cerebral cortex - placenta - spleen  | 1-500 - 1/1000 - 1/500 poly@Rb 60/0/30 (tonsil - mammary gland) |
| GATA3<br>(RR8686)<br>(0.5 mg/ml)        | Bd Pharmingen               | 1/500    | poly@Ms<br>30/15/15 | H1(10)            | rectum - urinary bladder - mammary gland              | ovary - liver - neurocortical cortex | 1/100 - 1/250 - 1/500 - 1/1000 (urinary bladder)                |

**Table S7.** Co-IHC staining conditions.

| Antibody            | Dilution        | Tissue                                           |
|---------------------|-----------------|--------------------------------------------------|
| CAXII - ER $\alpha$ | 1/750<br>1/1000 | Luminal ductal carcinoma comprising DCIS and IDC |
| CAXII - FOXA1       | 1/750<br>1/500  |                                                  |
| CAXII - GATA3       | 1/750<br>1/1000 |                                                  |
