# Supplementary material for: CAXII Is a Surrogate Marker for Luminal Breast Tumors Regulated by ER and GATA3
Source: MDPI journal article supplement (doi:10.3390/cancers14215453), 2022-11-06
Supplement: s1 [file s1]

Blots figures and compiled data analysis

DMEM (MCF-7), RPMI (T-47D et ZR-75) complemented with 10% of FBST + 1%P/S

Gel SDS-PAGE : 8-10%

Loading quantity : 40µg  
Standardisation : Lamin B1/Actin B

Blocking with 5% milk in PBST (Tris Buffer Saline 1X + 0.1% tween 20) for 1h.

Secondary Antibody dilution, anti-rabbit/mouse (1:10000)

Primary Antibodies    rAb CA12 (44 kDa), Dr Sly, dilution 1/3000 MCF-7    Actin B (42 kDa), dilution 1/10000.  
                                 rAb CA12 (44 kDa), Dr Sly, dilution 1/7000 T-47D/ZR-75    Lamin B1 (66kDa), dilution 1/3000.

Figure 4C

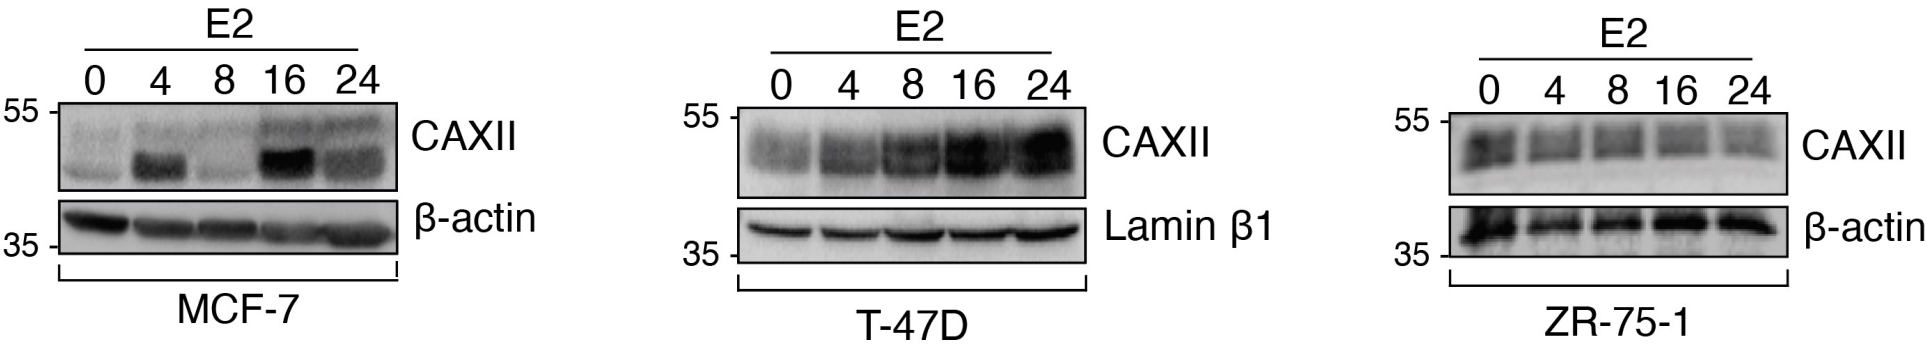

DMEM (MCF-7), RPMI (T-47D et ZR-75) complemented with 10% of FBST + 1%P/S

Gel SDS-PAGE : 8-10%

Loading quantity : 40µg  
Standardisation : Lamin B1/Actin B

Blocking with 5% milk in PBST (Tris Buffer Saline 1X + 0.1% tween 20) for 1h.

Secondary Antibody dilution, anti-rabbit/mouse (1:10000)

Primary Antibodies    rAb CA12 (44 kDa), Dr Sly, dilution 1/3000 MCF-7    Actin B (42 kDa), dilution 1/10000.  
                                 rAb CA12 (44 kDa), Dr Sly, dilution 1/7000 T-47D/ZR-75    Lamin B1 (66kDa), dilution 1/3000.

Figure 4C

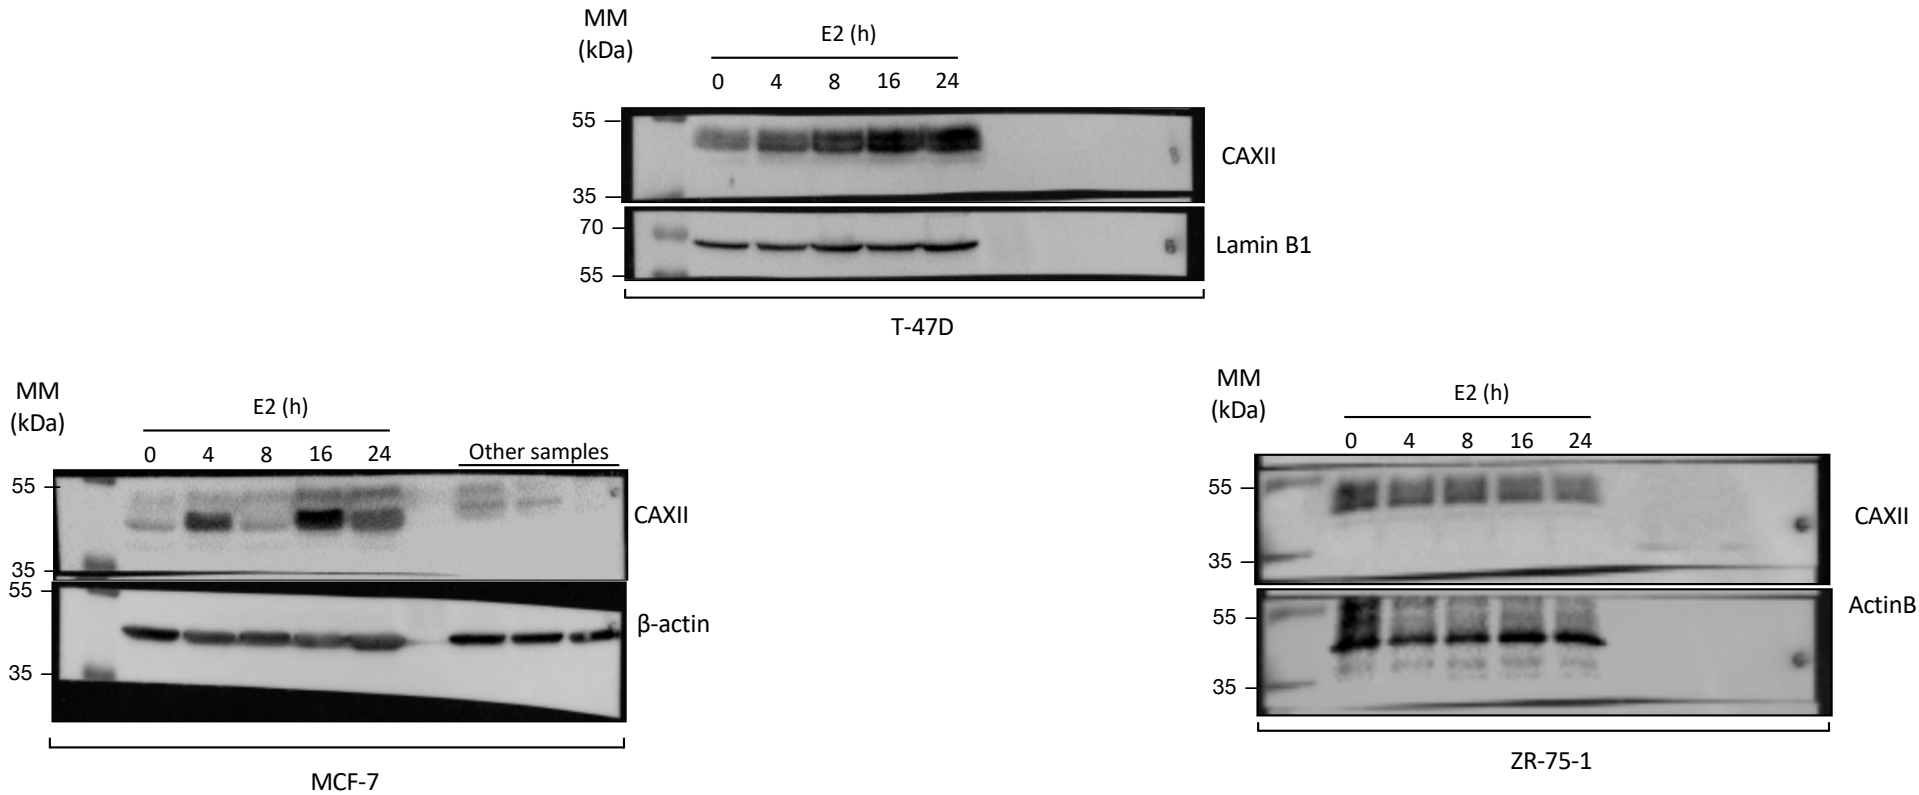

Figure 4D

First Replicate :

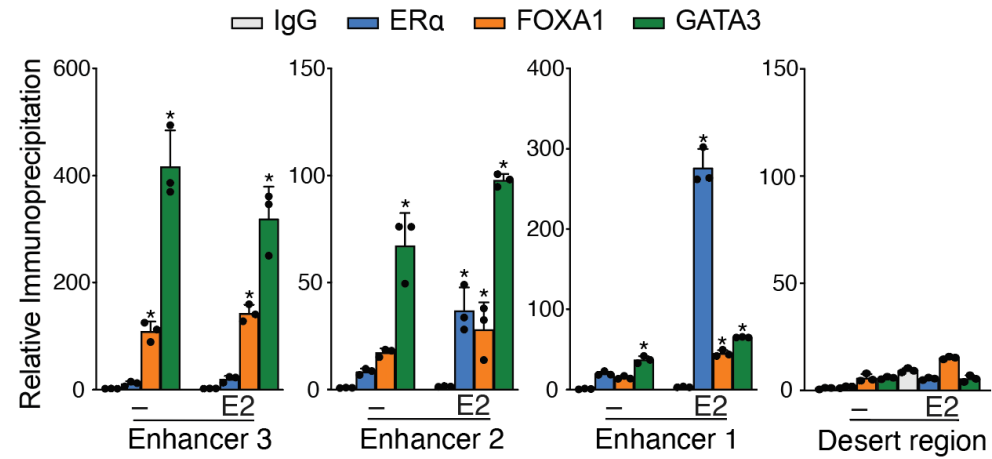

Second Replicate :

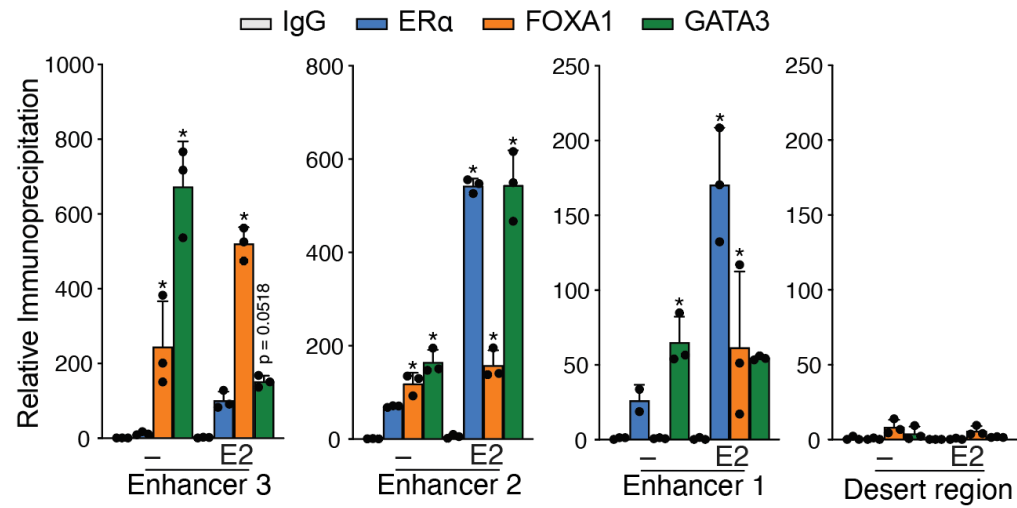

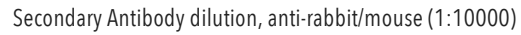

DMEM (MCF-7) complemented with 10% of FBST + 1%P/S

Figure 4E

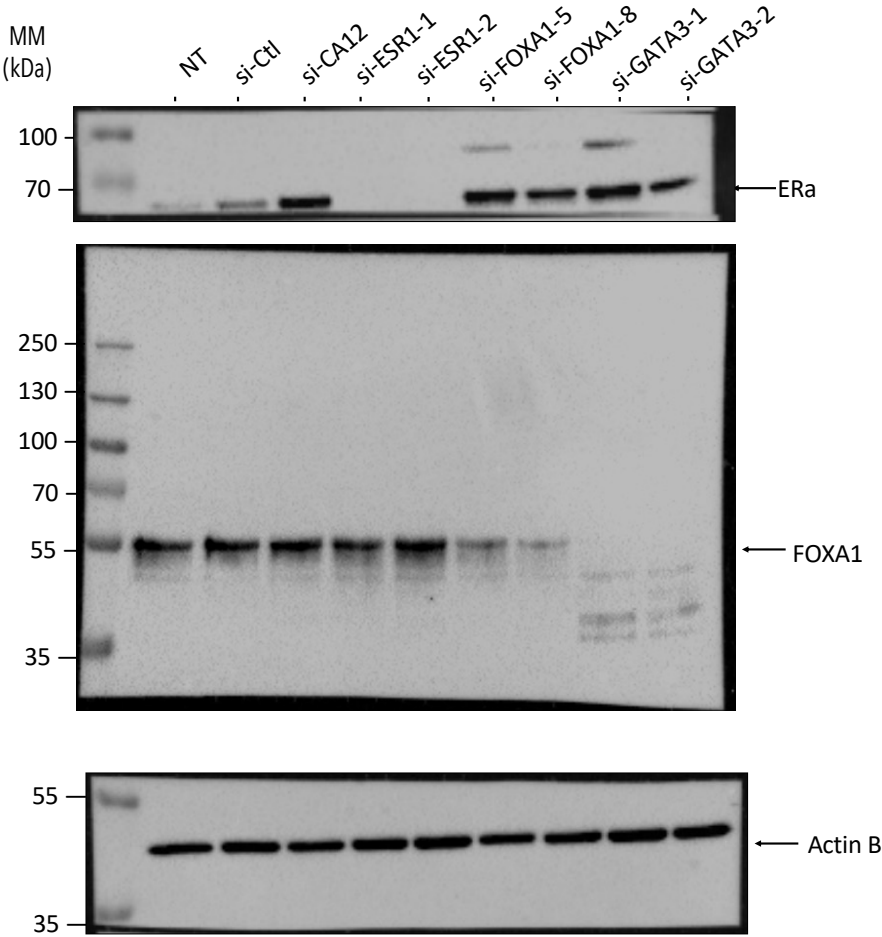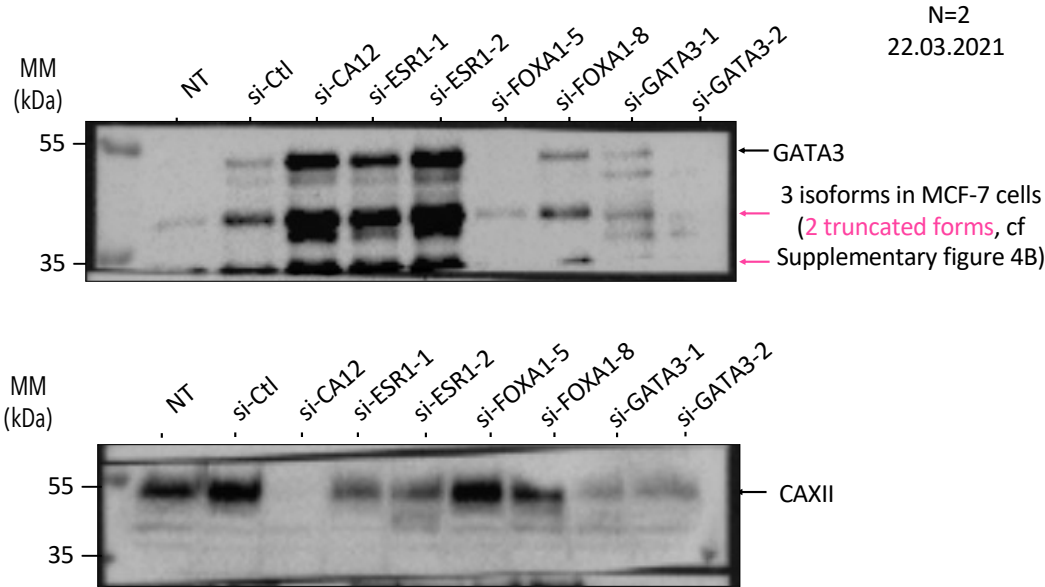

N=2  
22.03.2021

**RPMI (T-47D, ZR-75) complemented with 10% of FBS**

Gel SDS-PAGE : 8-10%      Loading quantity : 40µg      Blocking with 5% milk in PBST (Tris Buffer Saline 1X + 0.1% tween 20) for 1h.

Primary Antibodies    rAb CA12 (44 kDa), Dr Sly, dilution 1/7000 T-47D/ZR-75      Actin B (42 kDa), dilution 1/10000.  
                                 mAb GATA3 (48kDa), 558686 BD Pharmingen, dilution 1/1000      Lamin B1 (66kDa), dilution 1/3000.  
Secondary Antibody dilution, anti-rabbit/mouse (1:10000)

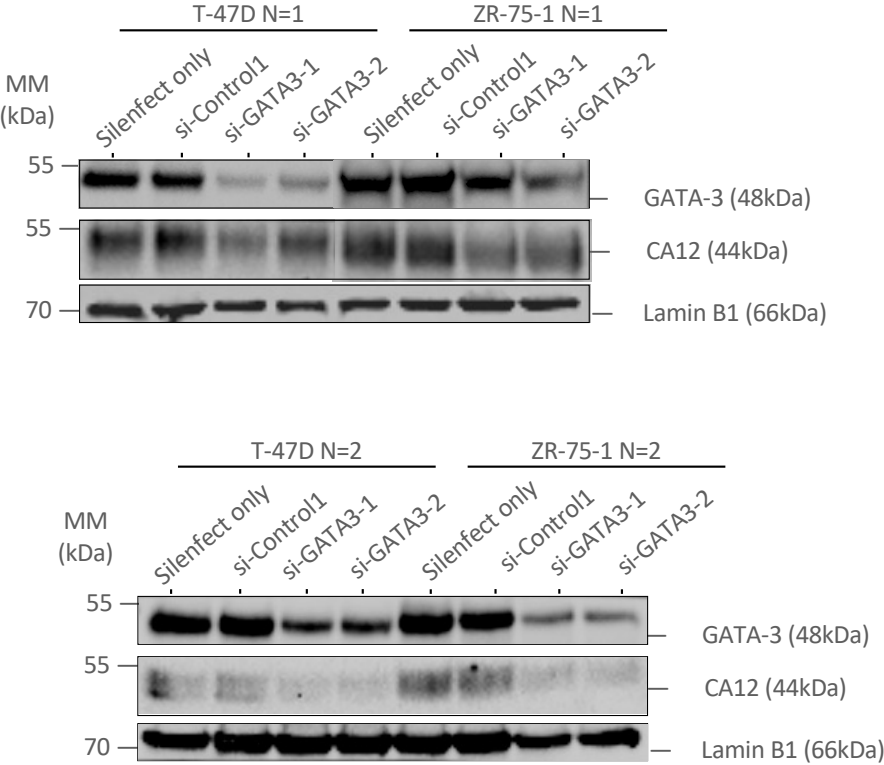

**Figure 4 F-G**

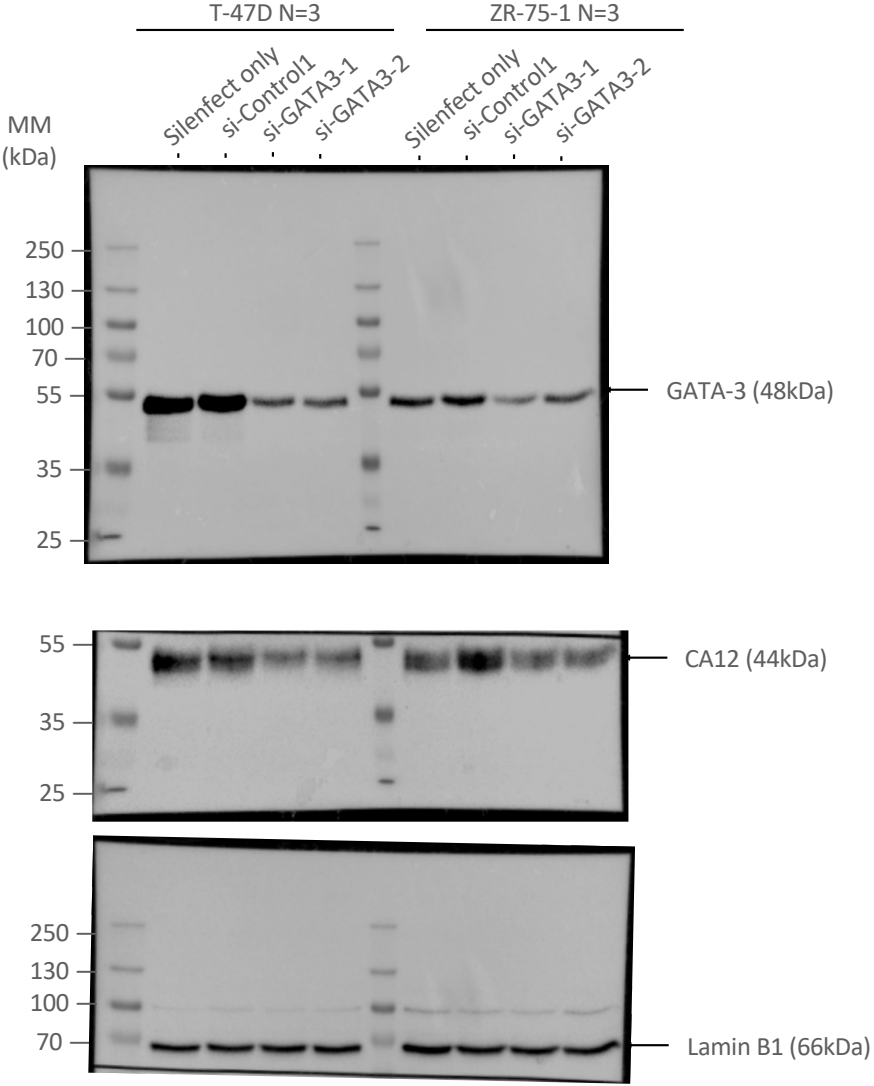

|         |            | Ratio si-GATA3/si-Control |           |           |
|---------|------------|---------------------------|-----------|-----------|
|         |            | N1                        | N2        | N3        |
| T-47D   | si-Control | 1                         | 1         | 1         |
|         | si-GATA3-1 | 0.5189918                 | 0.4443561 | 0.4381894 |
|         | si-GATA3-2 | 0.8887144                 | 0.4074548 | 0.4713568 |
|         | si-Control | 1                         | 1         | 1         |
|         | si-GATA3-1 | 0.5718026                 | 0.3456733 | 0.5053662 |
| ZR-75-1 | si-GATA3-2 | 0.6993163                 | 0.2814324 | 0.4057448 |

**Figure 4 F-G**

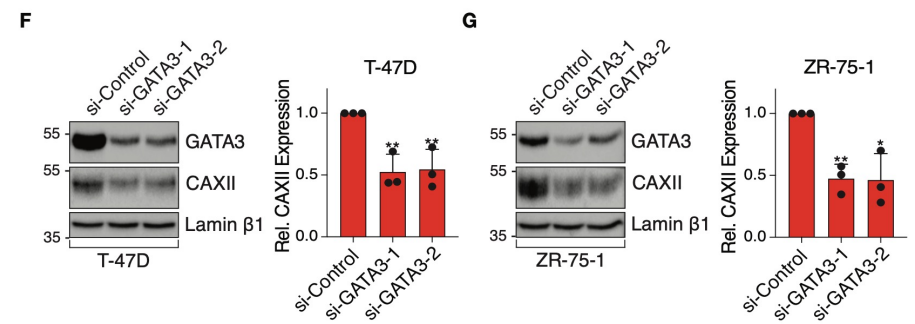



Blocking with 5% milk in PBST (Tris Buffer Saline 1X + 0.1% tween 20) for 1h.

Standardisation : Actin B

## Primary Antibodies

rAb CA12 (44 kDa), Dr Sly, dilution 1/7000

rAb ERa (66 kDa), 60-C anticorps, dilution 1/2000

rAb FOXA1 (55kDa), Ab170933, dilution 1/1000

mAb GATA3 (48kDa), 558686 BD Pharmingen, dilution 1/1000

mAb Actin B (42 kDa), dilution 1/10000.

Secondary Antibody dilution, anti-rabbit/mouse (1:10000)

### Figure S4B

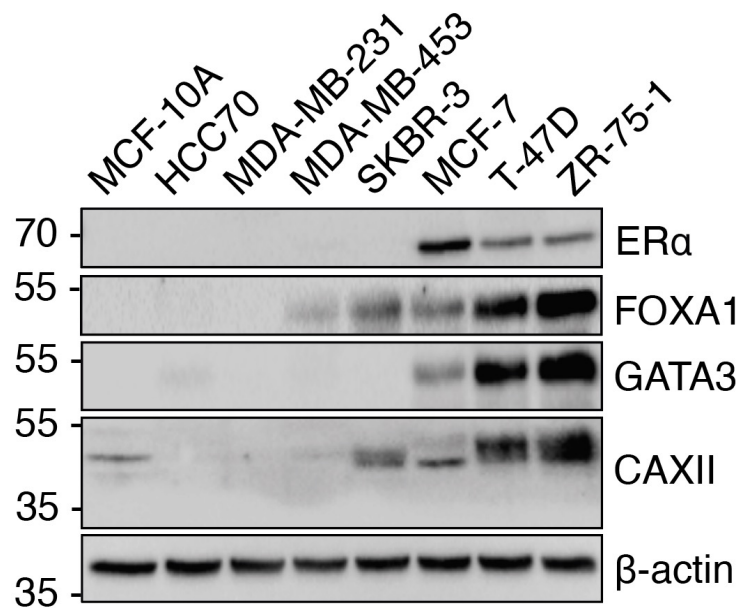

DMEM (MCF-7, SKBR-3, MDA-231, MDA-453), RPMI (T-47D, ZR-75 and HCC-70) and DMEM/F12 (MCF10A) complemented with 10% of FBS

Gel SDS-PAGE : 8-10%      Loading quantity : 40µg      Blocking with 5% milk in PBST (Tris Buffer Saline 1X + 0.1% tween 20) for 1h.  
Standardisation : Actin B

Primary Antibodies  
rAb CA12 (44 kDa), Dr Sly, dilution 1/7000  
rAb ERa (66 kDa), 60-C anticorps, dilution 1/2000  
rAb FOXA1 (55kDa), Ab170933, dilution 1/1000  
mAb GATA3 (48kDa), 558686 BD Pharmingen, dilution 1/1000  
mAb Actin B (42 kDa), dilution 1/10000.

Secondary Antibody dilution, anti-rabbit/mouse (1:10000)

Figure S4B

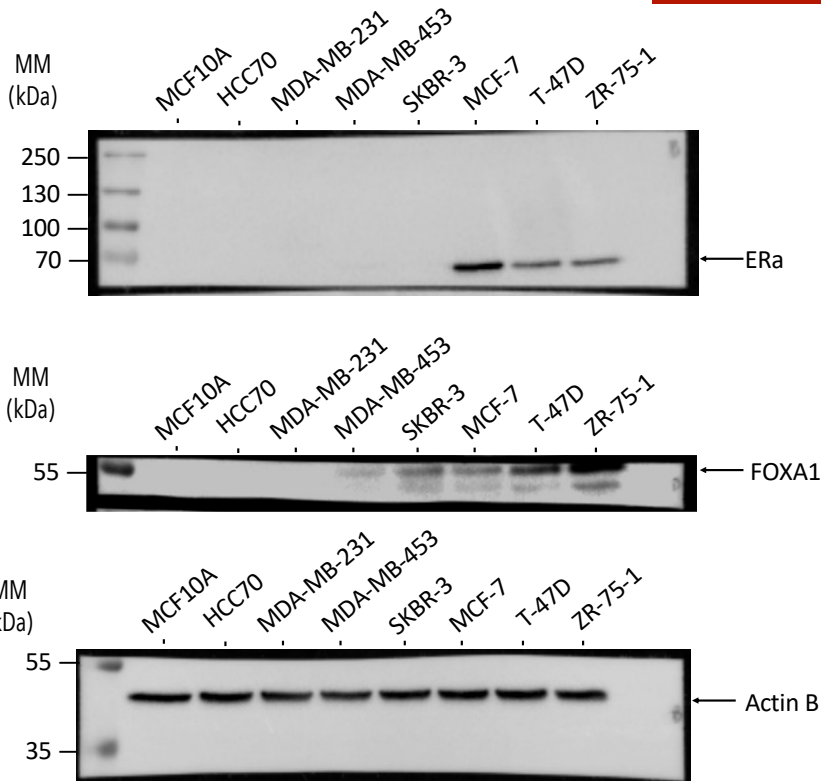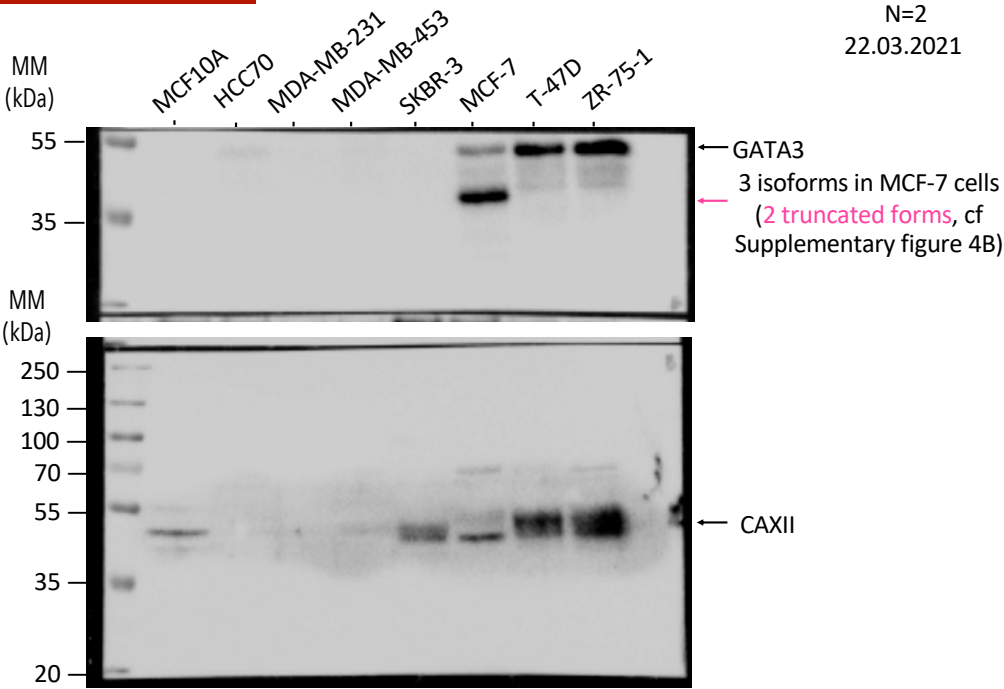

N=2  
22.03.2021
